# Supplementary material for: Surface engineering of sponge-like silicon particles for high-performance lithium-ion battery anodes
Source: Royal Society of Chemistry journal article supplement (doi:10.1039/c3cp51190a), 2013-01-01
Supplement: c3cp51190a.pdf [file c3cp51190a.pdf]

## Supplementary Information

# Surface Engineering of Sponge-like Silicon Particles for High-Performance Lithium-Ion Battery Anodes

Jung-In Lee, Jang-Hoon Park, Sang-Young Lee,\* and Soojin Park\*

Interdisciplinary School of Green Energy, Ulsan National Institute of Science and Technology  
(UNIST), Ulsan 689-798, Korea

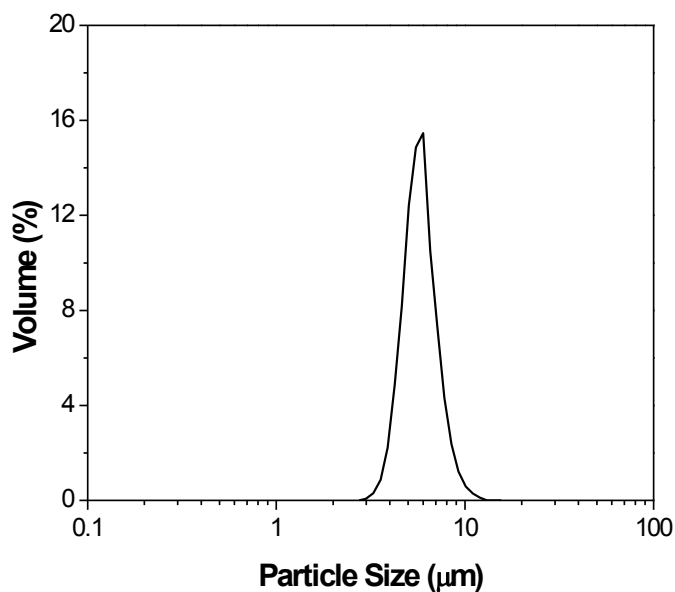

**Figure S1.** Particle size distribution of sponge-like Si particles after chemical etching. After etching, an average particle size of the Si is ~6 μm.

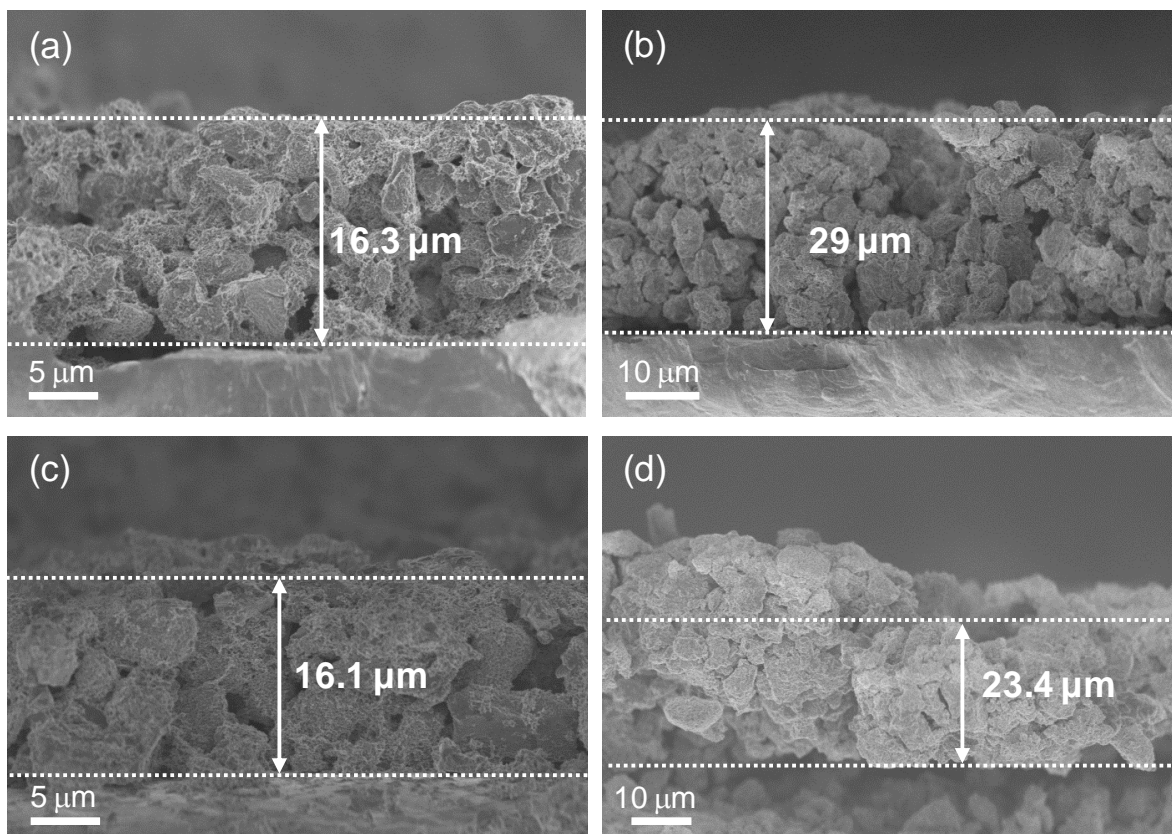

**Figure S2.** SEM images showing volume expansion of electrodes before and after cycling. Thicknesses of Si@C (A: before, B: after cycle) and Si@C@PI (C: before, D: after cycle) electrodes were investigated by cross-sectional SEM. The Si@C electrode showed volume expansion of 78%, while the Si@C@PI exhibited less volume expansion of 45% after 80 cycles.

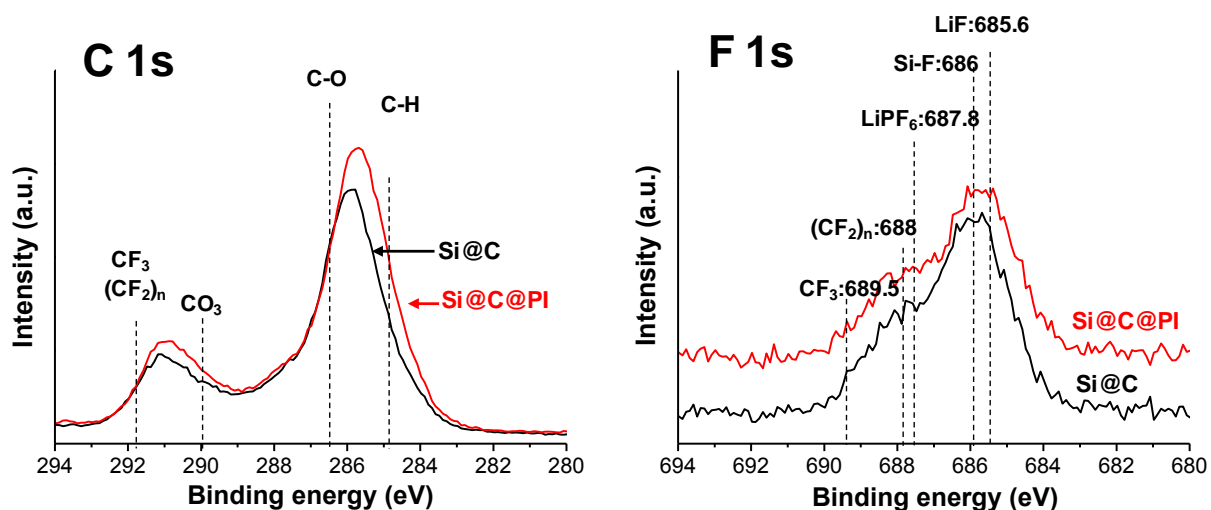

**Figure S3.** XPS spectra of C 1s and F 1s core level obtained from the Si@C (black) and Si@C@PI (red) electrodes after 30 cycles. The peaks of  $\text{Li}_2\text{CO}_3$  and  $\text{ROCO}_2\text{Li}$  at 291eV, the peak at 136 eV arising from  $\text{Li}_x\text{POF}_y$  and  $\text{Li}_x\text{PF}_y$ , and the LiF peak at 687.2 eV are typically seen in carbon-coated Si electrodes.

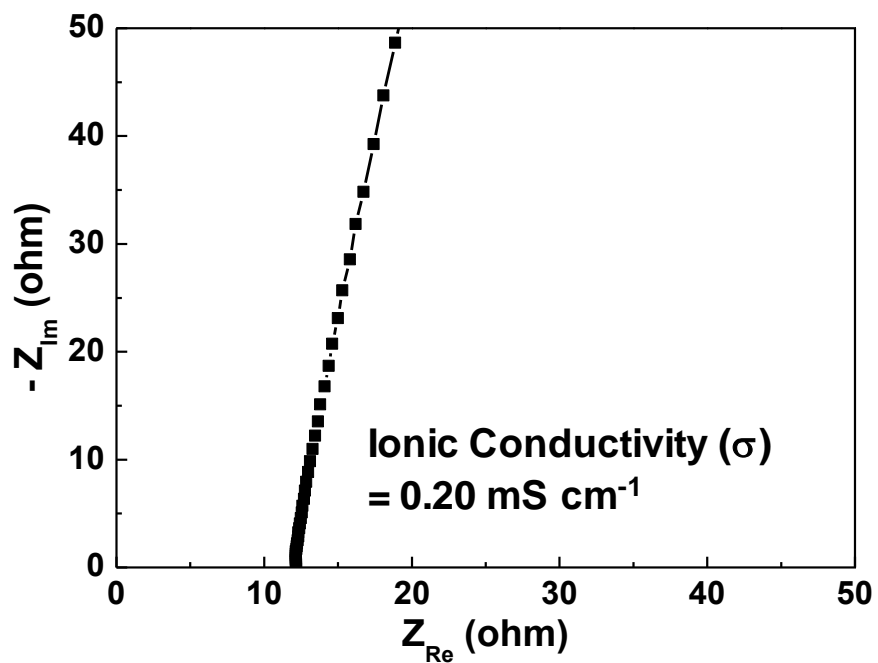

**Figure S4.** Ionic conductivity of PI films swelled with the liquid electrolyte (1.3 M  $\text{LiPF}_6$  in EC/DEC = 30/70 v/v). The liquid electrolyte-swollen PI film was found to provide a high ionic conductivity of  $0.20 \text{ mS cm}^{-1}$  at room temperature.

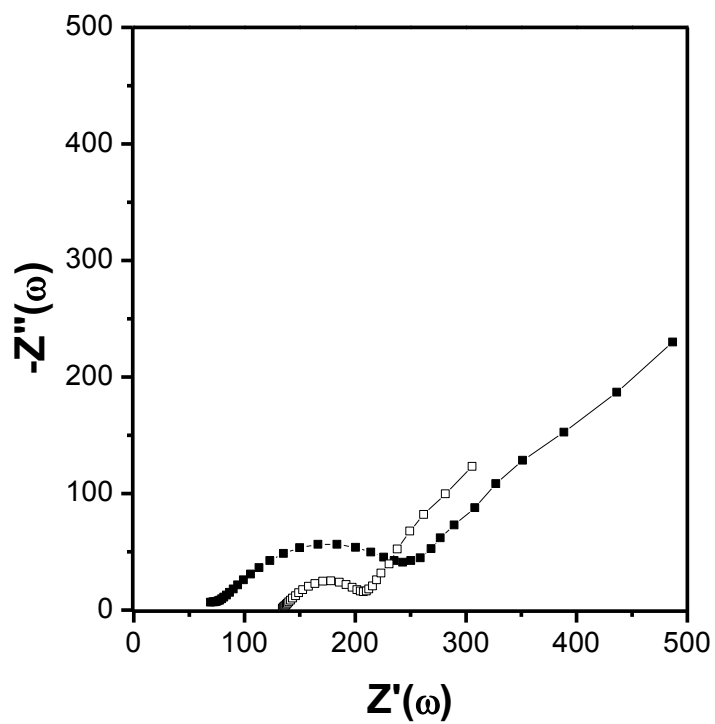

**Figure S5.** AC impedance spectra (after 80 cycles) of cells assembled with Si@C (solid square) and Si@C@PI (open square).
